# Supplementary material
Source: Springer Nature journal article supplement (https://www.springermedizin.de/resource/supplementary/12890_2009_232_MOESM1_ESM.pdf/9504760)

# SALAMANCA, GTO.

## 2003

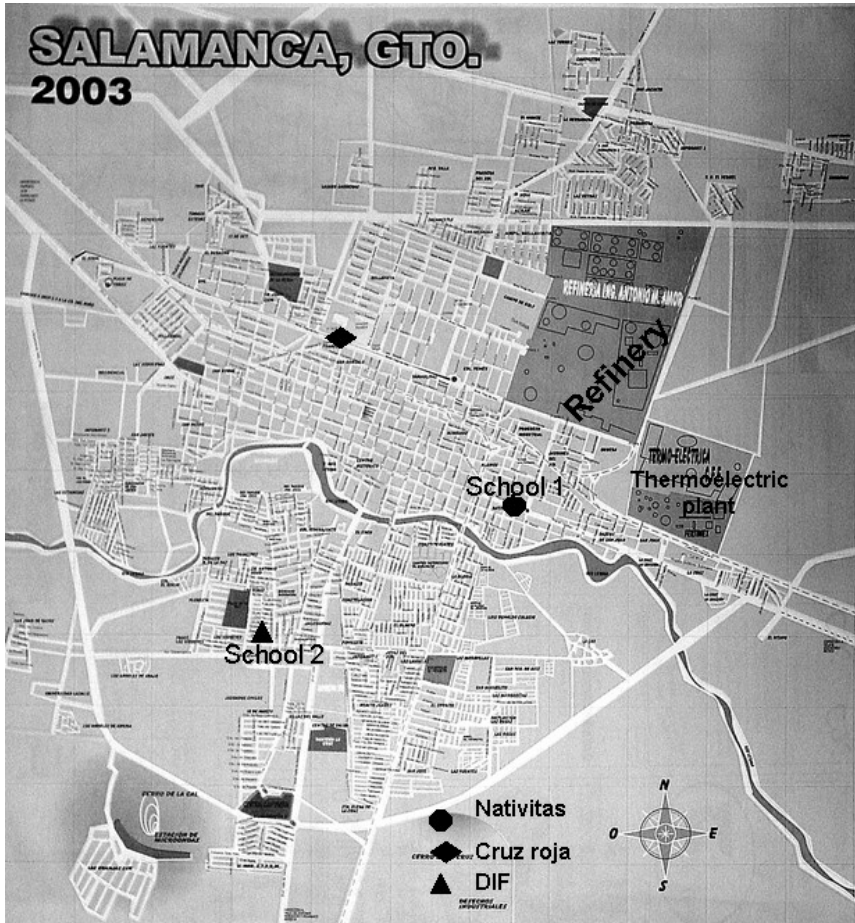

School 1

Thermoelectric plant

School 2

Nativitas

Cruz roja

DIF

CEPES

DIRECCION INDUSTRIALES

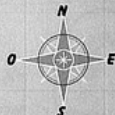

Supplement: MOESM1 [file 9504760]
